# Supplementary material
Source: PubMed Central journal article supplement (PMC4356222)
Supplement: Supp_Fig1.pdf [file Supp_Fig1.pdf]

## Supplementary Data

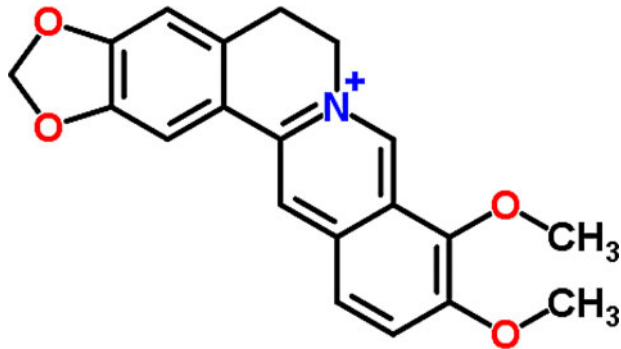

**SUPPLEMENTARY FIG. S1.** Chemical structure of berberine. Molecular Formula:  $C_{20}H_{18}NO_4$ ; Average mass: 336.360687 Da; Monoisotopic mass: 336.123047 Da; Systematic name: 9,10-Dimethoxy-5,6-dihydro[1,3]dioxolo[4,5-g]isoquinolino[3,2-a]isoquinolin-7-ium.
