# Supplementary material
Source: PubMed Central journal article supplement (PMC4356222)
Supplement: Supp_Fig2.pdf [file Supp_Fig2.pdf]

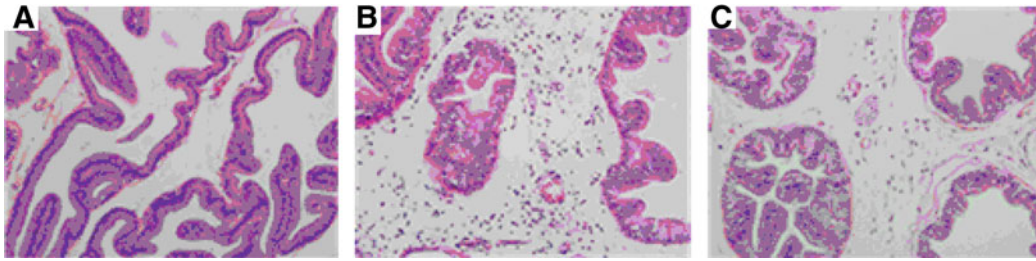

**SUPPLEMENTARY FIG. S2.** Representative photomicrographs of tissue sections stained with H&E. (A) control group; (B) model group; (C) berberine group. (Magnification, 200 $\times$ ).
