# Supplementary material
Source: PubMed Central journal article supplement (PMC4356222)
Supplement: Supp_Fig3.pdf [file Supp_Fig3.pdf]

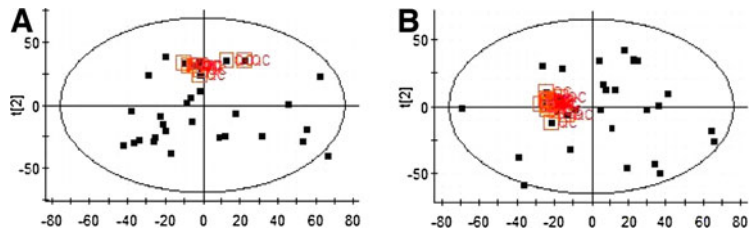

**SUPPLEMENTARY FIG. S3.** Principal component analysis of QC urine samples from rat prostatitis carried out with UPLC-Q-TOF/MS. (A) positive mode; (B) negative mode. *Black box* present urine samples, and samples in *red box* present QCs.
