# Supplementary material
Source: PubMed Central journal article supplement (PMC4356222)
Supplement: Supp_Fig4.pdf [file Supp_Fig4.pdf]

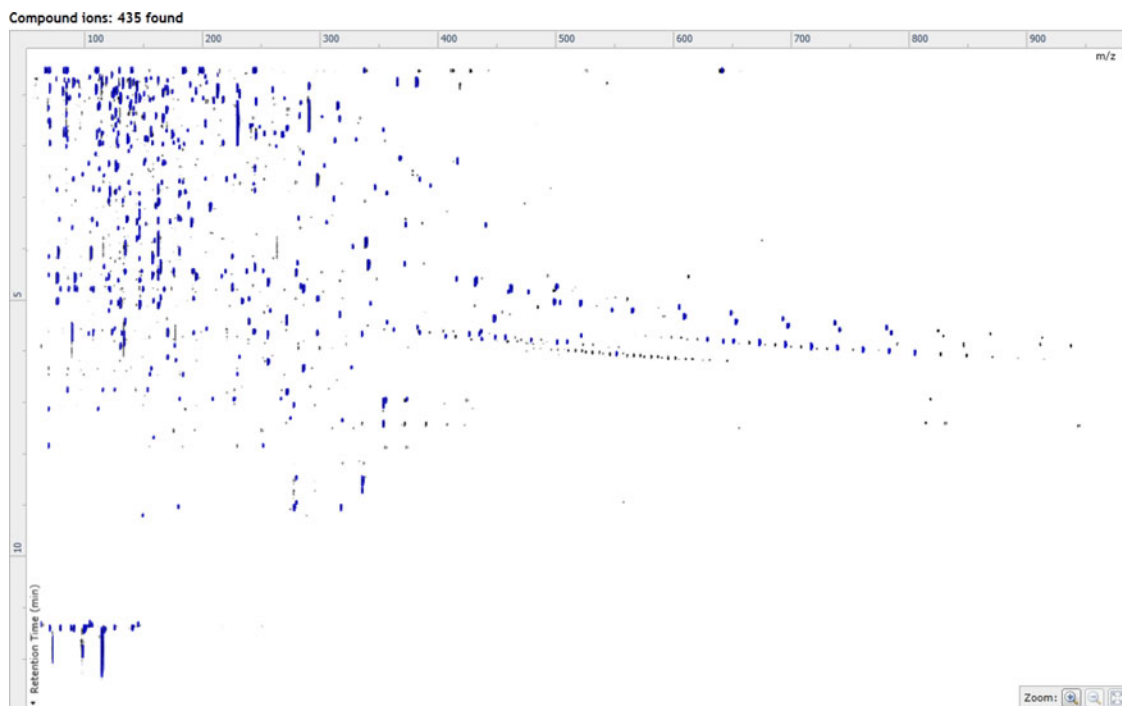

**SUPPLEMENTARY FIG. S4.** Typical 2D ion intensity map taking a detailed approach to alignment. The Alignment algorithm will generate 'compound ions' in the retention time direction. The 'compound ions' are highlighted in *blue*.
