# Supplementary material
Source: PubMed Central journal article supplement (PMC4356222)
Supplement: Supp_Table1.pdf [file Supp_Table1.pdf]

SUPPLEMENTARY TABLE S1. EXPRESSIONS OF TNF- $\alpha$   
AND CONCENTRATION OF PROTEIN EXTRAVASATION  
IN ALL GROUPS

| <i>Group</i> | <i>Plasma protein extravasation</i> | <i>TNF-<math>\alpha</math></i> |
|--------------|-------------------------------------|--------------------------------|
| Sham         | 21.44 $\pm$ 1.61                    | 1.00                           |
| Mod          | 29.49 $\pm$ 9.93*                   | 3.39 $\pm$ 0.48**              |
| Limonin      | 21.83 $\pm$ 2.23 <sup>#</sup>       | 1.40 $\pm$ 0.48 <sup>##</sup>  |

\*Significant difference from control at  $p < 0.05$ ; \*\*significant difference from control at  $p < 0.001$ ; <sup>#</sup>significant difference from model at  $p < 0.05$ ; <sup>##</sup>significant difference from model at  $p < 0.001$ .
