# Supplementary material
Source: PubMed Central journal article supplement (PMC4356222)
Supplement: Supp_Table2.pdf [file Supp_Table2.pdf]

SUPPLEMENTARY TABLE S2. RESULT OF STABILITY OF PROPOSED METHOD IN URINE METABOLOMICS

| <i>Mode</i> | <i>m/z</i> | <i>Retention time(min)</i> |              | <i>Mass accuracy</i> |              | <i>Peak area</i> |              |
|-------------|------------|----------------------------|--------------|----------------------|--------------|------------------|--------------|
|             |            | <i>Mean</i>                | <i>CV(%)</i> | <i>Mean</i>          | <i>CV(%)</i> | <i>Mean</i>      | <i>CV(%)</i> |
| ESI+        | 138.0914   | 1.2                        | 0.589256     | 138.0911             | 0.000189     | 7.0926           | 7.020359     |
|             | 314.1236   | 1.196                      | 0.457962     | 314.1238             | 0.000192     | 19.4992          | 8.321324     |
|             | 180.1032   | 2.908                      | 0.153787     | 180.1037             | 0.000409     | 6.2114           | 5.064961     |
|             | 447.0922   | 5.332                      | 0.083874     | 447.0918             | 8.72E-05     | 29.67132         | 7.142834     |
| ESI-        | 124.0068   | 1.06                       | 0            | 124.0069             | 0.000377     | 62.224           | 2.748375     |
|             | 312.1077   | 1.216                      | 0.45043      | 312.1085             | 0.00015      | 40.68            | 5.516837     |
|             | 173.0810   | 5.168                      | 0.086535     | 173.0799             | 0.000378     | 179.1556         | 2.80058      |
|             | 407.2794   | 6.942                      | 0.064421     | 407.2792             | 0.000169     | 130.9644         | 5.364034     |
