# Supplementary material
Source: PubMed Central journal article supplement (PMC4356222)
Supplement: Supp_Table3.pdf [file Supp_Table3.pdf]

SUPPLEMENTARY TABLE S3. INFORMATION OF POTENTIAL BIOMARKERS RELATED WITH PROSTATITIS IDENTIFIED IN POSITIVE ION MODE

| <i>No</i> | <i>Retention time(min)</i> | <i>m/z</i> | <i>Compound ID</i> | <i>Adducts</i> | <i>Formula</i> | <i>Mass Error (ppm)</i> | <i>Compound</i>                | <i>Anova (p)</i> | <i>VIP</i> |
|-----------|----------------------------|------------|--------------------|----------------|----------------|-------------------------|--------------------------------|------------------|------------|
| 1         | 0.72                       | 138.0548   | HMDB01123          | M+H            | C7H7NO2        | -4.84                   | 2-Aminobenzoic acid            | 0.0707           | 2.87       |
| 2         | 0.87                       | 123.0552   | HMDB01406          | M+H            | C6H6N2O        | -4.92                   | Niacinamide                    | 0.0003           | 2.51       |
| 2         | 1.06                       | 146.0925   | HMDB03464          | M+H            | C5H11N3O2      | -3.40                   | 4-Guanidinobutanoic acid       | 0.0224           | 2.79       |
| 3         | 1.2                        | 138.092    | HMDB00306          | M+H            | C8H11NO        | 1.10                    | Tyramine                       | 0.0029           | 2.77       |
| 4         | 1.44                       | 150.0785   | HMDB02099          | M+H            | C6H7N5         | 3.23                    | 6-Methyladenine                | 0.4598           | 2.75       |
| 5         | 1.76                       | 126.0662   | HMDB02894          | M+H            | C5H7N3O        | -3.92                   | 5-Methylcytosine               | 0.3834           | 2.71       |
| 6         | 1.92                       | 112.051    | HMDB00630          | M+H            | C4H5N3O        | -0.70                   | Cytosine                       | 0.9802           | 2.69       |
| 7         | 2.58                       | 139.0502   | HMDB00301          | M+H            | C6H6N2O2       | -4.32                   | Urocanic acid                  | 0.8381           | 2.69       |
| 8         | 2.91                       | 121.065    | HMDB06236          | M+H            | C8H8O          | -2.60                   | Phenylacetaldehyde             | 0.0249           | 2.65       |
| 9         | 3.07                       | 162.0558   | HMDB02285          | M+H            | C9H7NO2        | 2.08                    | 2-Indolecarboxylic acid        | 0.3251           | 2.61       |
| 12        | 3.46                       | 130.0871   | HMDB00070          | M+H            | C6H11NO2       | 2.54                    | Pipecolic acid                 | 0.8064           | 2.40       |
| 13        | 2.38                       | 162.0556   | HMDB04077          | M+H            | C9H7NO2        | 0.80                    | 4,6-Dihydroxyquinoline         | 0.0712           | 2.38       |
| 10        | 4.28                       | 116.071    | HMDB00162          | M+H            | C5H9NO2        | -0.91                   | L-Proline                      | 0.9633           | 2.52       |
| 14        | 4.61                       | 157.062    | HMDB01014          | M+H            | C6H8N2O3       | 4.47                    | 4-Imidazolone-5-propionic acid | 0.2953           | 2.37       |
