# Supplementary material
Source: PubMed Central journal article supplement (PMC4356222)
Supplement: Supp_Table4.pdf [file Supp_Table4.pdf]

SUPPLEMENTARY TABLE S4. RESULT FROM INGENUITY PATHWAY ANALYSIS WITH METABOLYST BASED ON KEGG

| <i>No</i> | <i>Pathway</i>                         | <i>Total</i> | <i>Expected</i> | <i>Hits</i> | <i>Raw p</i> | <i>Impact</i> |
|-----------|----------------------------------------|--------------|-----------------|-------------|--------------|---------------|
| 1.        | Histidine metabolism                   | 15           | 0.14            | 2           | 0.0078       | 0.25          |
| 2.        | Nicotinate and nicotinamide metabolism | 13           | 0.12            | 1           | 0.1145       | 0.24          |
| 2.        | Phenylalanine metabolism               | 9            | 0.08            | 1           | 0.0806       | 0.13          |
| 3.        | Arginine and proline metabolism        | 44           | 0.41            | 2           | 0.0603       | 0.06          |
| 4.        | Tyrosine metabolism                    | 42           | 0.39            | 1           | 0.3278       | 0.03          |
| 5.        | Tryptophan metabolism                  | 41           | 0.38            | 2           | 0.0531       | 0.00          |
| 6.        | Lysine degradation                     | 20           | 0.19            | 1           | 0.1711       | 0.00          |
| 7.        | Aminoacyl-tRNA biosynthesis            | 67           | 0.62            | 1           | 0.4724       | 0.00          |
